# Supplementary material
Source: PubMed Central journal article supplement (PMC3482876)
Supplement: Supp_Fig1.pdf [file Supp_Fig1.pdf]

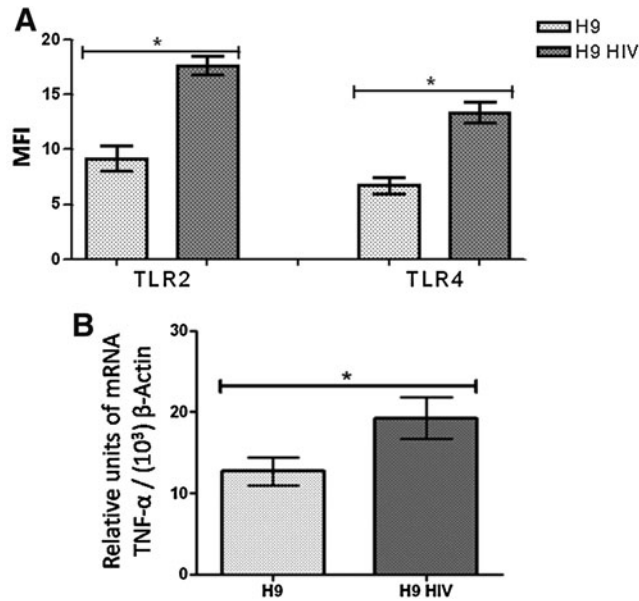

**SUPPLEMENTARY FIG. S1.** Modulation of TLR2 and TLR4 expression in H9 cells chronically infected with HIV-1. **(A)** TLR2 and TLR4 expression was measured at the protein level by flow cytometry in H9 cells and in the infected clone H9 HTLV-IIIcc. H9 cells with lymphocytic morphology were gated according to physical characteristics and excluding dead cells. Data are presented as overall MFI for TLRs, after subtraction of the isotype staining background. Representative results of three independent experiments shown as median and range are presented. **(B)** mRNA TNF- $\alpha$  level was quantified by real time RT-PCR in H9 cells and the infected clone H9 HTLV-IIIcc, and normalized with the housekeeping gene  $\beta$ -actin. Relative units of transcripts versus  $1 \times 10^3$   $\beta$ -actin transcripts are shown as a median and range. Comparisons were performed using unpaired two-tailed Student's *t*-tests (Mann-Whitney *U*-tests). The level of significance was  $*p < 0.05$ .
