# Supplementary material
Source: PubMed Central journal article supplement (PMC3482876)
Supplement: Supp_Fig2.pdf [file Supp_Fig2.pdf]

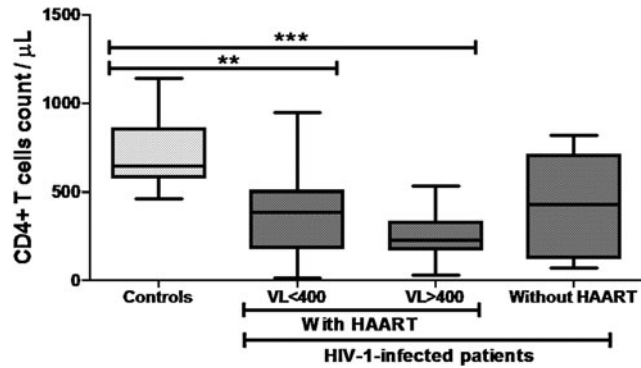

**SUPPLEMENTARY FIG. S2.** CD4<sup>+</sup> T cell counts in peripheral blood from healthy controls and HIV-1-infected patients. The counts of CD4<sup>+</sup> T cells are shown in the healthy donors (controls) and the three groups of HIV-1-infected patients, classified according to viral load and the use of HAART. Comparisons were made by Kruskal–Wallis ANOVA tests and Dunn’s posttests. The level of significance is \*\* $p < 0.01$  and \*\*\* $p < 0.001$ ; controls ( $n = 25$ ), HIV-1-infected patients with viral loads less than 400 copies of viral RNA per ml and using HAART ( $n = 26$ ), HIV-1-infected patients with viral loads higher than 400 copies of viral RNA per ml and using HAART ( $n = 12$ ), and HIV-1-infected patients without HAART ( $n = 11$ ). Similar results were observed with relative counts (data not shown).
